# Supplementary material
Source: PubMed Central journal article supplement (PMC9254893)

**Supplemental Table 1. Definition of coronary artery disease, cerebrovascular disease, chronic kidney disease and diabetes.**

| <b>Disease</b>                        | <b>HES statistics ICD-10</b> | <b>HES statistics ICD-9</b>                                                                                                                | <b>HES statistics OPCS-4</b>                                              | <b>Non-cancer illness (20002)</b> | <b>Operation code (20004)</b> | <b>Other data fields</b>                                                                                                                                                                                                                  |
|---------------------------------------|------------------------------|--------------------------------------------------------------------------------------------------------------------------------------------|---------------------------------------------------------------------------|-----------------------------------|-------------------------------|-------------------------------------------------------------------------------------------------------------------------------------------------------------------------------------------------------------------------------------------|
| <b>Coronary artery disease, n (%)</b> | I21, I22, I23, I24.1, I25.2  | 410*, 411*, 412*, 429.79, 413, 414                                                                                                         | K40.1-4, K41.1-4, K45.1-5, K49.1-2, K49.8-9, K50.2, K75.1-4, K75.8-9, K40 | 1074, 1075                        | 1070, 1095                    | Vascular/heart problems, diagnosed by doctor:<br>Biobank field: 6150, 1: Heart attack                                                                                                                                                     |
| <b>Cerebrovascular disease, n (%)</b> | I63.*, I64.*, G45.*          | 434.*, 435.*, 436.*                                                                                                                        | L29.4, L29.5, L30.3, L31.1, L31.3, L31.4, L35.4, L37.2                    | 1082, 1583                        | 1105, 1109                    | Vascular/heart problems; diagnosed by doctor (Biobank field: 6150, 3:Stroke)                                                                                                                                                              |
| <b>Chronic kidney disease, n (%)</b>  | N183, N184, N185             | 5853, 5855, 5954                                                                                                                           |                                                                           | 1192, 1193                        |                               |                                                                                                                                                                                                                                           |
| <b>Type 1 diabetes</b>                | E10, O230;                   | 25001, 25011, 25021, 25031, 25041, 25051, 25061, 25093, 25071, 25081, 25091, 25003, 25013, 25023, 25033, 25043, 25053, 25063, 25073, 25083 |                                                                           | 122,212,231,220                   |                               |                                                                                                                                                                                                                                           |
| <b>Type 2 diabetes</b>                | E11, O231                    | 25000, 25010, 25020, 25030, 25040, 25050, 25060, 25070, 25080, 25090, 25002, 25012, 25022, 25032, 25042, 25052, 25062, 25072, 25082, 25092 |                                                                           |                                   |                               | Treatment and medication code, Biobank Field 20003: 1140868902, 1140874646, 1140874674, 1140874718, 1140874744, 1140883066, 1140884600, 1141152590, 1141157284, 1141168660, 1141171646, 1141173882, 1141189090;<br>Biobank field 2443 = 1 |

**Supplemental Table 2. Definition of Peripheral Artery Disease**

| <b>Field name</b>                                                                      | <b>Data Code</b>                         | <b>Data code definition</b>                                    |
|----------------------------------------------------------------------------------------|------------------------------------------|----------------------------------------------------------------|
| <b>Non-cancer illness code, self-reported (20002)</b>                                  | 1067                                     | Peripheral vascular disease                                    |
|                                                                                        | 1087                                     | Leg claudication/ intermittent claudication                    |
|                                                                                        | 1088                                     | Arterial embolism                                              |
| <b>Diagnoses: main ICD10; secondary ICD10; primary/ secondary cause of death ICD10</b> | I70.0                                    | Atherosclerosis of aorta                                       |
|                                                                                        | I70.00                                   | Atherosclerosis of aorta (without gangrene)                    |
|                                                                                        | I70.01                                   | Atherosclerosis of aorta (with gangrene)                       |
|                                                                                        | I70.2                                    | Atherosclerosis of arteries of the extremities                 |
|                                                                                        | I70.20                                   | Atherosclerosis of arteries of extremities (without gangrene)  |
|                                                                                        | I70.21                                   | Atherosclerosis of arteries of extremities (with gangrene)     |
|                                                                                        | I70.8                                    | Atherosclerosis of other arteries                              |
|                                                                                        | I70.80                                   | Atherosclerosis of other arteries (without gangrene)           |
|                                                                                        | I70.9                                    | Generalized and unspecified atherosclerosis                    |
|                                                                                        | I70.90                                   | Generalized and unspecified atherosclerosis (without gangrene) |
|                                                                                        | I73.8                                    | Other specified peripheral vascular diseases                   |
| I73.9                                                                                  | Peripheral vascular disease, unspecified |                                                                |
| <b>Diagnoses main ICD9; secondary ICD9</b>                                             | 4400                                     | Atherosclerosis of aorta                                       |
|                                                                                        | 4402                                     | Atherosclerosis of arteries of the extremities                 |
|                                                                                        | 4438                                     | Other specified peripheral vascular disease                    |
|                                                                                        | 4439                                     | Peripheral vascular disease, unspecified                       |
| <b>Operation code, self-reported (20004)</b>                                           | 1102                                     | Fem-pop bypass/leg artery bypass                               |
|                                                                                        | 1108                                     | Leg artery angioplasty +/- stent                               |
|                                                                                        | 1440                                     | Amputation of leg                                              |
|                                                                                        | X09.3                                    | Amputation of leg above knee                                   |
|                                                                                        | X09.4                                    | Amputation of leg through knee                                 |
|                                                                                        | X09.5                                    | Amputation of leg below knee                                   |

**Supplemental Table 2. Definition of Peripheral Artery Disease**

| <b>Field name</b>                                                                      | <b>Data Code</b>                                                  | <b>Data code definition</b>                                                                        |
|----------------------------------------------------------------------------------------|-------------------------------------------------------------------|----------------------------------------------------------------------------------------------------|
| <b>Operative procedures<br/>main OPCS;<br/>Operative procedures<br/>secondary OPCS</b> | L21.6                                                             | Bypass of bifurcation of aorta by anastomosis of aorta to iliac artery NEC                         |
|                                                                                        | L51.3                                                             | Bypass of artery of leg by anastomosis of aorta to common femoral artery NEC                       |
|                                                                                        | L51.6                                                             | Bypass of artery of leg by anastomosis of iliac artery to femoral artery NEC                       |
|                                                                                        | L51.8                                                             | Other specified other bypass of iliac artery                                                       |
|                                                                                        | L52.1                                                             | Endarterectomy of iliac artery and patch repair of iliac artery                                    |
|                                                                                        | L52.2                                                             | Endarterectomy of iliac artery NEC                                                                 |
|                                                                                        | L54.1                                                             | Percutaneous transluminal angioplasty of iliac artery                                              |
|                                                                                        | L54.4                                                             | Percutaneous transluminal insertion of stent into iliac artery                                     |
|                                                                                        | L54.8                                                             | Other specified transluminal operations on iliac artery                                            |
|                                                                                        | L59.1                                                             | Bypass of femoral artery by anastomosis of femoral artery to femoral artery NEC                    |
|                                                                                        | L59.2                                                             | Bypass of femoral artery by anastomosis of femoral artery to popliteal artery using prosthesis NEC |
|                                                                                        | L59.3                                                             | Bypass of femoral artery by anastomosis of femoral artery to popliteal artery using vein graft NEC |
|                                                                                        | L59.4                                                             | Bypass of femoral artery by anastomosis of femoral artery to tibial artery using prosthesis NEC    |
|                                                                                        | L59.5                                                             | Bypass of femoral artery by anastomosis of femoral artery to tibial artery using vein graft NEC    |
|                                                                                        | L59.6                                                             | Bypass of femoral artery by anastomosis of femoral artery to peroneal artery using prosthesis NEC  |
|                                                                                        | L59.7                                                             | Bypass of femoral artery by anastomosis of femoral artery to peroneal artery using vein graft NEC  |
|                                                                                        | L59.8                                                             | Other specified other bypass of femoral artery                                                     |
|                                                                                        | L60.1                                                             | Endarterectomy of femoral artery and patch repair of femoral artery                                |
|                                                                                        | L60.2                                                             | Endarterectomy of femoral artery NEC                                                               |
|                                                                                        | L63.1                                                             | Percutaneous transluminal angioplasty of femoral artery                                            |
| L63.5                                                                                  | Percutaneous transluminal insertion of stent into femoral artery  |                                                                                                    |
| L63.9                                                                                  | Unspecified transluminal operations on femoral artery             |                                                                                                    |
| L66.7                                                                                  | Percutaneous transluminal placement of peripheral stent in artery |                                                                                                    |
| <b>Medication</b>                                                                      | 1141181150                                                        | cilostazol                                                                                         |
|                                                                                        | 1141181154                                                        | pletal 100mg tablet                                                                                |

**Supplemental Table 3. Comparison of genome-wide polygenic risk scores based on tuning parameters using PRSs**

|                                                                           | AUC <sup>a</sup> | 95% CI         | <i>P</i> value          |
|---------------------------------------------------------------------------|------------------|----------------|-------------------------|
| <b><i>P</i> value threshold</b>                                           |                  |                |                         |
| <b>1</b>                                                                  | 0.716            | (0.709, 0.723) | Ref                     |
| <b>0.5</b>                                                                | 0.715            | (0.708, 0.722) | 0.245                   |
| <b>0.4</b>                                                                | 0.715            | (0.708, 0.722) | 0.143                   |
| <b>0.3</b>                                                                | 0.715            | (0.708, 0.722) | 0.046                   |
| <b>0.2</b>                                                                | 0.715            | (0.708, 0.722) | 0.022                   |
| <b>0.1</b>                                                                | 0.714            | (0.707, 0.721) | 8.716×10 <sup>-3</sup>  |
| <b>0.05</b>                                                               | 0.714            | (0.707, 0.721) | 6.062×10 <sup>-3</sup>  |
| <b>0.001</b>                                                              | 0.710            | (0.703, 0.717) | 5.611×10 <sup>-7</sup>  |
| <b>5×10<sup>-8</sup></b>                                                  | 0.706            | (0.699, 0.713) | 3.748×10 <sup>-13</sup> |
| <b>Global shrinkage parameter phi (with <i>P</i> value threshold = 1)</b> |                  |                |                         |
| <b>1×10<sup>-4</sup></b>                                                  | 0.716            | (0.707, 0.723) | Ref                     |
| <b>1</b>                                                                  | 0.710            | (0.703, 0.717) | 8.177×10 <sup>-10</sup> |
| <b>1×10<sup>-2</sup></b>                                                  | 0.713            | (0.706, 0.720) | 2.721×10 <sup>-5</sup>  |
| <b>1×10<sup>-6</sup></b>                                                  | 0.712            | (0.705, 0.720) | 8.793×10 <sup>-5</sup>  |
| <b>Not specified</b>                                                      | 0.715            | (0.706, 0.723) | 0.728                   |

Results were rounded off to three decimal places to show the difference in detail. <sup>a</sup>AUC: area under the curve was calculated using logistic regression (adjusted for age, sex, the first 5 PCs) in a validation dataset of 487,320 participants in the UK Biobank of which 5,759 had been diagnosed with PAD. CI: Confidence Interval.

**Supplemental Table 4. Area under the curve for PRS based on PAD and CAD GWAS**

|                   | PRSiCe           |                |          | PRScs |                |          |
|-------------------|------------------|----------------|----------|-------|----------------|----------|
|                   | AUC <sup>a</sup> | 95% CI         | <i>P</i> | AUC   | 95% CI         | <i>P</i> |
| <b>MVP PAD</b>    | 0.707            | (0.699, 0.713) | Ref      | 0.716 | (0.709, 0.723) | Ref      |
| <b>C4D CAD</b>    | 0.705            | (0.698, 0.712) | 0.150    | 0.705 | (0.698, 0.712) | 0.033    |
| <b>CARDIoGRAM</b> | 0.706            | (0.699, 0.714) | 0.906    | 0.708 | (0.700, 0.715) | 0.019    |

Results were rounded off to three decimal places to show the difference in detail. <sup>a</sup>AUC: area under the curve was calculated using logistic regression (adjusted for age, sex, the first 5 PCs) in a validation dataset of 487,320 participants in the UK Biobank of which 5,759 had been diagnosed with PAD. <sup>b</sup>Statistical significance of AUC was calculated by Delong’s test. PAD – peripheral artery disease; CAD – coronary artery disease; CI - Confidence Interval; MVP – Million Veterans Program; CARDIoGRAM - Coronary Artery Disease Genome-Wide Replication and Meta-Analysis; C4D - CARDIoGRAM plus The Coronary Artery Disease consortium.

**Supplemental Table 5. Performance of a PRS-enhanced Clinical Risk Model for PAD**

| <b>Group</b>           |                     | <b>AUC, mean (min, max)<sup>a</sup></b> | <b>NRI, 95% CI<sup>b</sup></b> |
|------------------------|---------------------|-----------------------------------------|--------------------------------|
| <b>Sex</b>             | <b>Men</b>          | 0.77 (0.75, 0.78)                       | 0.10 (0.09, 0.11)              |
|                        | <b>Women</b>        | 0.69 (0.65, 0.72)                       | 0.04 (0.03, 0.06)              |
| <b>Race</b>            | <b>European</b>     | 0.76 (0.75, 0.78)                       | 0.04 (0.03, 0.06)              |
|                        | <b>Non-European</b> | 0.71 (0.67, 0.75)                       | 0.03 (-0.06, 0.13)             |
| <b>Age</b>             | <b>&gt; 50</b>      | 0.76 (0.74, 0.78)                       | 0.10 (0.08, 0.11)              |
|                        | <b>≤ 50</b>         | 0.63 (0.57, 0.70)                       | 0.05 (0.01, 0.09)              |
| <b>All individuals</b> |                     | 0.76 (0.75, 0.77)                       | 0.07 (0.06, 0.08)              |

<sup>a</sup>AUC, mean (min, max): Mean value (minimum value, maximum value) of area under the curve was calculated by 10-fold cross validation with 454,486 participants in the UK Biobank of which 5,228 had been diagnosed with PAD; <sup>b</sup>NRI: Net reclassification index compared PRS-enhanced clinical risk model with clinical risk model. PAD – peripheral artery disease; NRI – net reclassification index.

**Supplemental Table 6. Reclassification Table for PRS-enhanced Clinical Risk Model**

| Group    | Clinical model | PRS-enhanced model    |        |       |       | % Reclassified |
|----------|----------------|-----------------------|--------|-------|-------|----------------|
|          |                | 0 - 0.5% <sup>a</sup> | 0.5-1% | 1-2%  | > 2%  |                |
| Controls | 0 - 0.5%       | 123272                | 13617  | 544   | 4     | 10             |
|          | 0.5-1%         | 30850                 | 105636 | 12887 | 338   | 29             |
|          | 1-2%           | 753                   | 29614  | 76214 | 9066  | 34             |
|          | > 2%           | 0                     | 126    | 5255  | 46310 | 10             |
| Cases    | 0 - 0.5%       | 476                   | 74     | 12    | 0     | 15             |
|          | 0.5-1%         | 123                   | 554    | 121   | 7     | 31             |
|          | 1-2%           | 3                     | 232    | 1034  | 269   | 33             |
|          | > 2%           | 0                     | 2      | 91    | 2230  | 4              |
| All      | 0 - 0.5%       | 122796                | 13543  | 532   | 4     | 10             |
|          | 0.5-1%         | 30727                 | 105082 | 12766 | 331   | 29             |
|          | 1-2%           | 750                   | 29382  | 75180 | 8797  | 34             |
|          | > 2%           | 0                     | 124    | 5164  | 44080 | 11             |

<sup>a</sup>The prevalence of PAD in UK Biobank is 1%. Cutoff thresholds were set at 0.5%, 1%, 2% and > 2%.

## Supplemental Figure Legend

**Supplemental Figure 1. Disease risk estimated from polygenic risk score (PRS) derived from different genome-wide association studies (GWAS).** (A-C) Peripheral artery disease (PAD) risk estimated from PRS calculated with C4D, CARDIoGRAM and the PAD-specific Million Veterans Program GWAS, respectively. OR: Odds ratio. Estimates were derived by conditional logistic regression adjusting for age, sex, and the first 5 principal components.

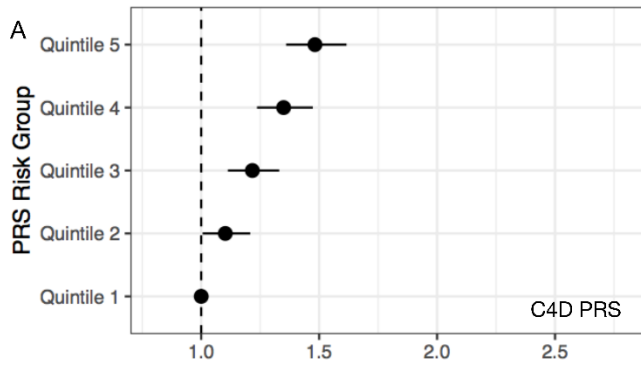

| PRS Quintile | OR (95% CI)       | P value                |
|--------------|-------------------|------------------------|
| Quintile 5   | 1.48 (1.36, 1.62) | $3.38 \times 10^{-19}$ |
| Quintile 4   | 1.35 (1.24, 1.47) | $2.00 \times 10^{-11}$ |
| Quintile 3   | 1.22 (1.11, 1.33) | $1.69 \times 10^{-5}$  |
| Quintile 2   | 1.10 (1.01, 1.21) | $3.71 \times 10^{-2}$  |
| Quintile 1   | Ref.              | Ref.                   |

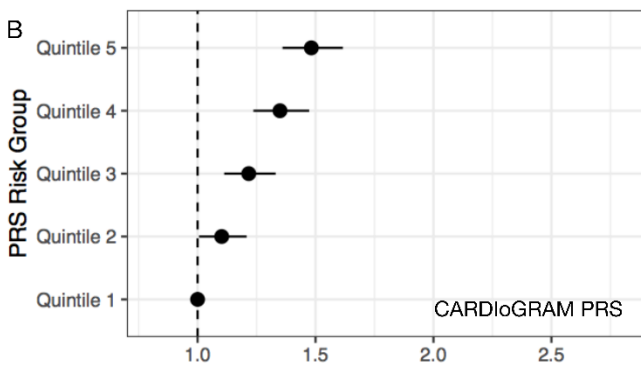

| PRS Quintile | OR (95% CI)       | P value                |
|--------------|-------------------|------------------------|
| Quintile 5   | 1.65 (1.51, 1.79) | $1.45 \times 10^{-30}$ |
| Quintile 4   | 1.32 (1.21, 1.44) | $7.51 \times 10^{-10}$ |
| Quintile 3   | 1.25 (1.14, 1.37) | $1.00 \times 10^{-6}$  |
| Quintile 2   | 1.10 (1.00, 1.20) | $5.52 \times 10^{-2}$  |
| Quintile 1   | Ref.              | Ref.                   |



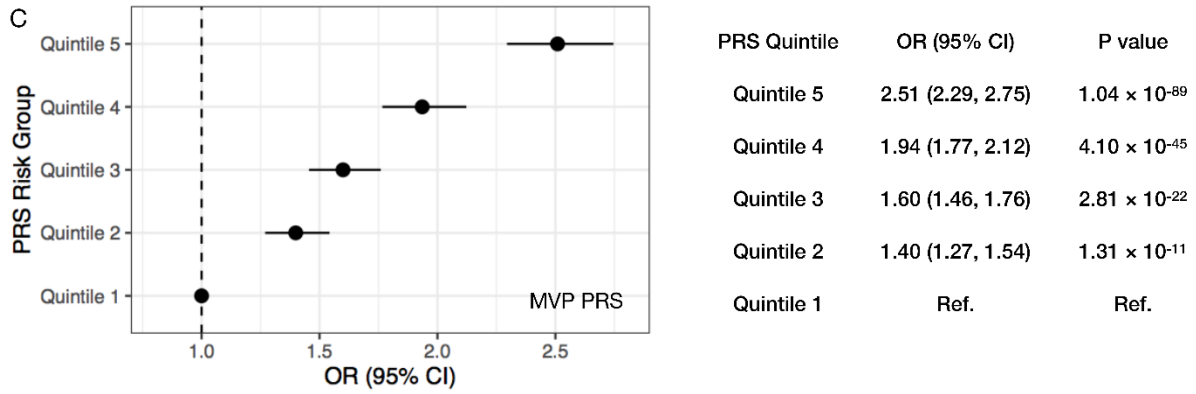

**Supplemental Figure 2. Genome-wide polygenic risk score (PRS) and the risk of peripheral artery disease (PAD).** (A-B) Odds of PAD in the UK biobank population for those with PRSs in the top 10<sup>th</sup> (A) and 5<sup>th</sup> percentiles (B) compared to the rest of the population.

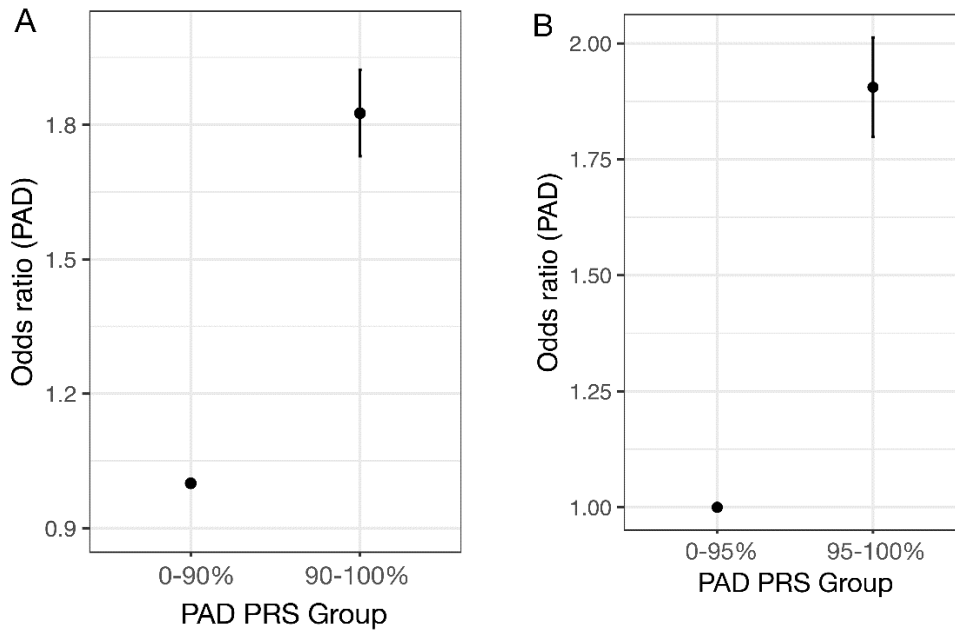

**Supplemental Figure 3. Goodness of fit and calibration metrics. (A)** Goodness of fit. With increasing model complexity, the model goodness-of-fit increases, as does the  $R^2$ . The addition of the genome-wide polygenic risk score (PRS) provides additional discrimination ability compared to a clinical model alone. **(B)** Calibration curve. Visual inspection of the calibration curve demonstrates that on average the predicted cohort risk in the PRS-enhanced model is similar to the observed risk.

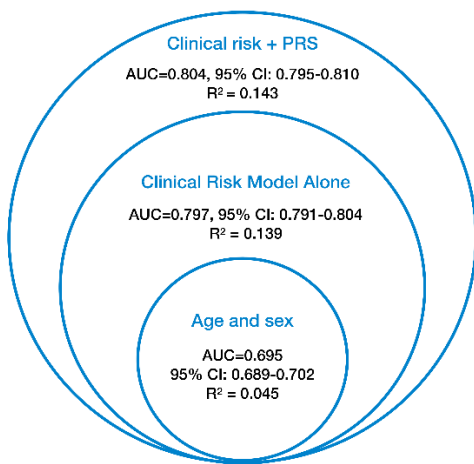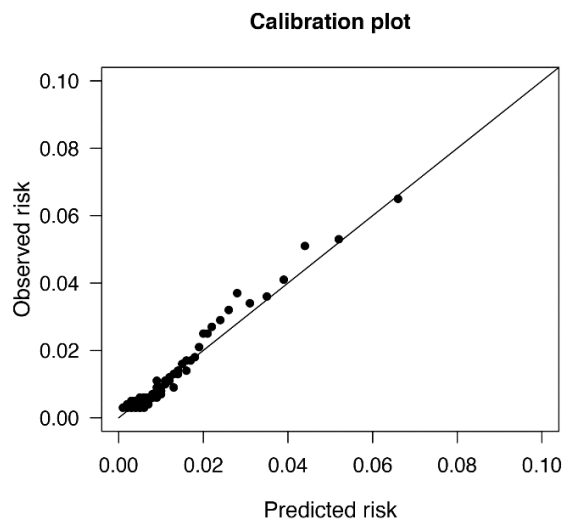

**Supplemental Figure 4. The prevalence of peripheral artery disease (PAD) in deciles of clinical risk score and polygenic risk score (PRS)-enhanced score.** A clinical risk score and PRS-enhanced score were calculated and categorized into deciles. The prevalence of PAD is shown based on each decile.

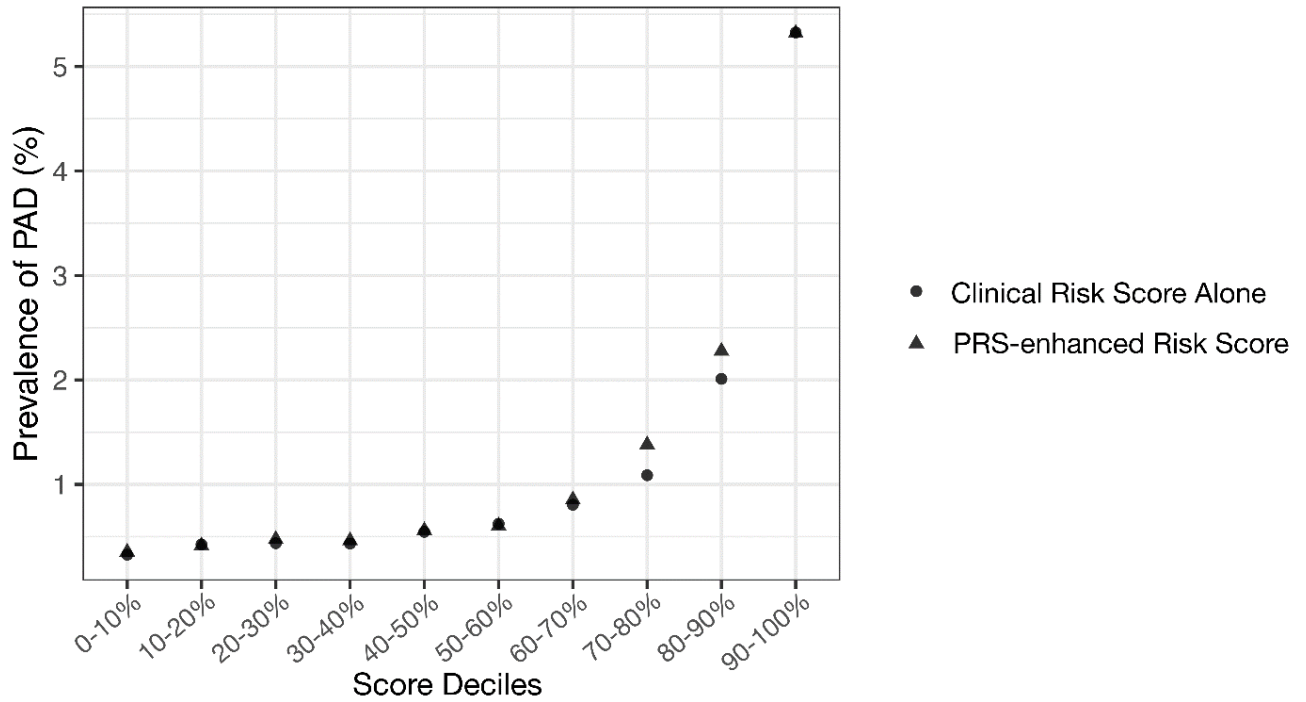

Supplement: NIHMS1815442-supplement-Supplemental_Materials.pdf [file NIHMS1815442-supplement-Supplemental_Materials.pdf]
